# Supplementary material for: Carbon material with high pyridine/graphite nitrogen content: an efficient electrocatalyst for the oxygen reduction reaction
Source: Royal Society of Chemistry journal article supplement (doi:10.1039/d3nj05221d), 2023-11-28
Supplement: d3nj05221d1.pdf [file d3nj05221d1.pdf]

## Supporting Information

# Carbon material with high pyridine/graphite nitrogen content: an efficient electrocatalyst for oxygen reduction reaction

*Jia Nan,<sup>\*a</sup> Shi Shufeng,<sup>b</sup> Yang Juxiang,<sup>a</sup> Jia Yuan,<sup>a</sup> Weng Qiang<sup>b</sup> and Chen Pei<sup>\*b</sup>*

<sup>a</sup> Xi'an University, College of Chemical Engineering, The Key Laboratory of Chemistry of New Material of Functional Inorganic Composites, Xi'an 710000, China.

<sup>b</sup> Shaanxi Normal University, International Joint Research Center for Shaanxi optoelectronic and material science, Xi'an 710000, China

To explore the effect of temperature on CNs, the effects of the three carbonizations on the ORR catalytic activity of the catalysts were investigated separately, and the XPS patterns of N elements in the catalysts were tested. It was found that at 800 °C, the catalyst had the best catalytic activity, with the highest content of graphitized-N to total pyridinic-N.

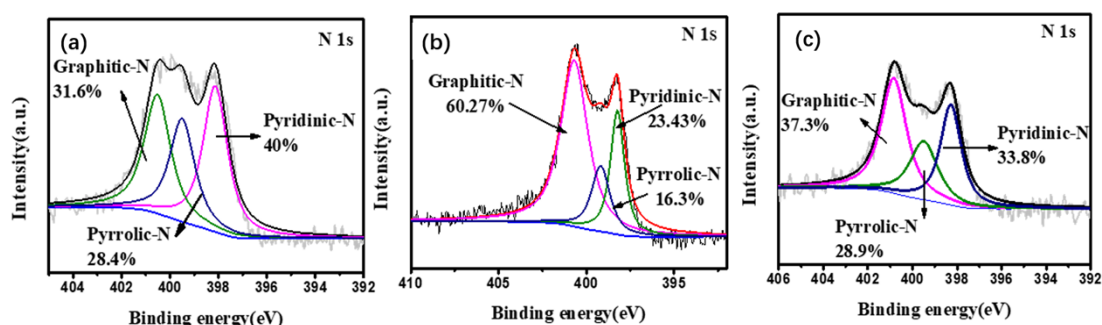

**Figure S1.** N 1s XPS fine spectra of (a) CN-700, (b) CN-800 and (c) CN-900.

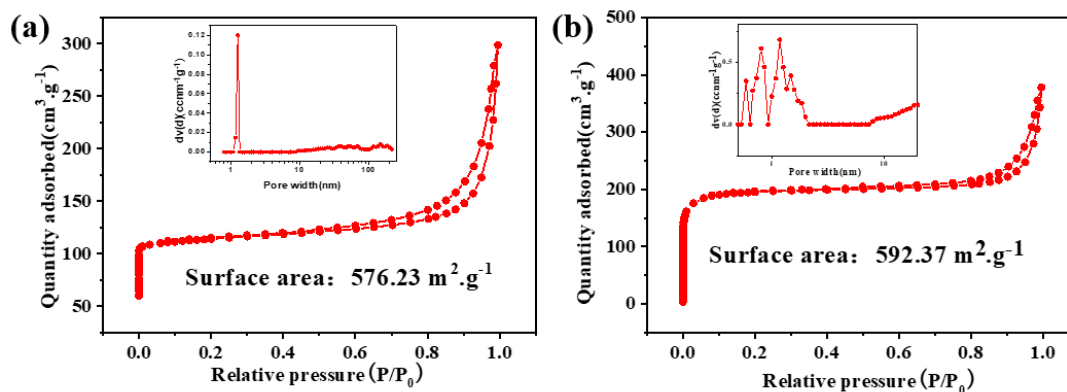

**Figure S2.** N<sub>2</sub> adsorption-desorption isotherms. Inse: pore-size distribution of (a) CN-700 and (b) CN-900.

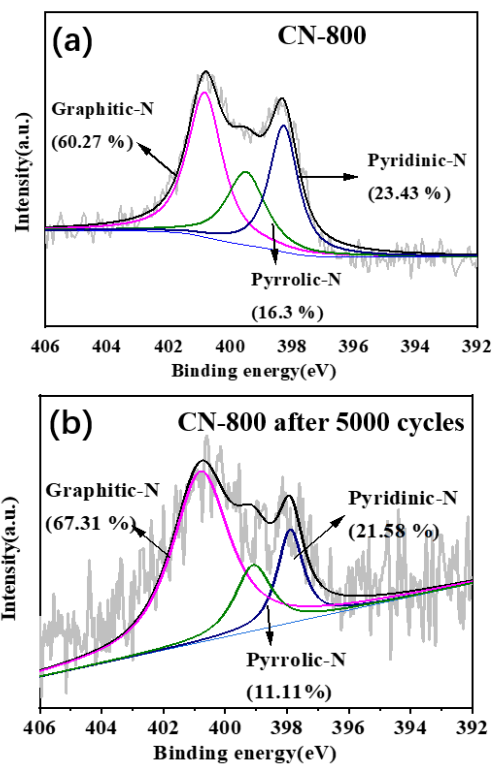

**Figure S3.** N1s XPS spectra of the CN-800 before and after 5000 cycles.
